# Supplementary material for: Shipborne lidar measurements showing the progression of the tropical reservoir of volcanic aerosol after the June 1991 Pinatubo eruption
Source: Copernicus journal article supplement (doi:10.5194/essd-12-2843-2020), 2020-11-14
Supplement: Supplementary file 1 [file essd-12-2843-2020-supplement.zip]

Archive with 4 entries (4 files):
- S1_Supplement_Datasets detailed description.pdf
- S2_Supplement_Trajectory_Loop_in_the_Caribbean.pdf
- essd-12-2843-2020-supplement-title-page.pdf
- S3_Supplement_Mean_Lower-stratospheric-winds_August-3-4-1991.pdf
