# Supplementary material for: Shipborne lidar measurements showing the progression of the tropical reservoir of volcanic aerosol after the June 1991 Pinatubo eruption
Source: Copernicus journal article supplement (doi:10.5194/essd-12-2843-2020), 2020-11-14
Supplement: Supplementary file 1 [file essd-12-2843-2020-supplement.zip › essd-12-2843-2020-supplement-title-page.pdf]

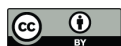

## *Supplement of*

# **Shipborne lidar measurements showing the progression of the tropical reservoir of volcanic aerosol after the June 1991 Pinatubo eruption**

**Juan-Carlos Antuña-Marrero et al.**

*Correspondence to:* Juan-Carlos Antuña-Marrero ([antuna@goa.uva.es](mailto:antuna@goa.uva.es))

- [essd-12-2843-2020-supplement-title-page.pdf](#)
- [S1\\_Supplement\\_Datasets detailed description.pdf](#)
- [S2\\_Supplement\\_Trajectory\\_Loop\\_in\\_the\\_Caribbean.pdf](#)
- [S3\\_Supplement\\_Mean\\_Lower-stratospheric-winds\\_August-3-4-1991.pdf](#)

The copyright of individual parts of the supplement might differ from the CC BY 4.0 License.
