# Supplementary material for: Shipborne lidar measurements showing the progression of the tropical reservoir of volcanic aerosol after the June 1991 Pinatubo eruption
Source: Copernicus journal article supplement (doi:10.5194/essd-12-2843-2020), 2020-11-14
Supplement: Supplementary file 1 [file essd-12-2843-2020-supplement.zip › S1_Supplement_Datasets detailed description.pdf]

## **Supplement S1: Datasets description and inventory.**

### **Professor Zubov dataset:**

Daily files, in ASCII, are labelled in using the date and an extension “.zub” and “.viz” corresponding to the instrument respectively in separate folders for Zubov and Vize vessels. In the case of the Prof. Zubov each individual daily file begin with the metadata on the top lines. Metadata consists, in the following order, latitude, longitude, date, measurement beginning and ending time, vertical resolution, beginning altitude, number of levels, number of laser shots, number of point for filtering, mean signal quick look, sky background, slope of the sky background, and value used for correct counting non linearity's, ratio between two channel if operate else 0. Then follow in columns altitude (km), scattering ratio, standard deviation of the SR, temperature in Kelvin degrees, temperature in Celsius degrees, statistical temperature error. The temperature in the file is calculated from Rayleigh scattering, if aerosols exist, temperature values are underestimated (Ketchkut, 2001, Personal communication).

The vertical resolution for all the scattering ratio profiles is 300m.

**Note:** The file for the measurement number 28 on table S1 do not contain the number of shots. It was filled with “NaN” in the respective column.

*Table S1: Inventory of the Zubov vessel lidar aerosols scattering ratio profiles form July to September 1991. Julian date for 1991. Latitude and longitude in degree with negative sign for south and east respectively. Lower and higher altitude of the profile in meters.*

| No. | Date     | Ho       | Hf       | # Day | Lat | Long | Low Z | Max Z | Levels | # Shots |
|-----|----------|----------|----------|-------|-----|------|-------|-------|--------|---------|
| 1   | 19910712 | 03:19:00 | 03:25:00 | 193.1 | 39  | -28  | 12200 | 55400 | 175    | 10000   |
| 2   | 19910712 | 22:36:00 | 05:28:00 | 193.9 | 36  | -35  | 12200 | 61700 | 185    | 30000   |
| 3   | 19910713 | 23:22:00 | 00:13:00 | 195.0 | 33  | -40  | 12200 | 67700 | 225    | 50000   |
| 4   | 19910714 | 21:19:00 | 05:31:00 | 195.9 | 30  | -47  | 12200 | 65300 | 200    | 51000   |
| 5   | 19910715 | 21:21:00 | 21:46:00 | 196.9 | 26  | -52  | 12200 | 62900 | 209    | 40000   |
| 6   | 19910717 | 00:35:00 | 05:45:00 | 198.0 | 22  | -58  | 12200 | 59300 | 205    | 60000   |
| 7   | 19910717 | 23:17:00 | 23:47:00 | 199.0 | 21  | -59  | 12200 | 49700 | 191    | 40000   |
| 8   | 19910719 | 22:35:00 | 23:08:00 | 200.9 | 19  | -62  | 12200 | 60200 | 167    | 40000   |
| 9   | 19910720 | 23:13:00 | 03:02:00 | 202.0 | 19  | -63  | 12200 | 58700 | 149    | 80000   |
| 10  | 19910721 | 21:14:00 | 02:34:00 | 202.9 | 19  | -62  | 12200 | 47600 | 152    | 70000   |
| 11  | 19910722 | 22:19:00 | 22:39:00 | 203.9 | 21  | -62  | 12200 | 63500 | 175    | 30000   |
| 12  | 19910724 | 23:18:00 | 23:30:00 | 206.0 | 21  | -69  | 12200 | 51500 | 127    | 20000   |
| 13  | 19910725 | 21:53:00 | 23:03:00 | 206.9 | 22  | -70  | 12200 | 64400 | 179    | 60000   |
| 14  | 19910726 | 21:53:00 | 22:28:00 | 207.9 | 20  | -74  | 12200 | 65900 | 166    | 40000   |
| 15  | 19910730 | 00:00:00 | 22:34:00 | 211.9 | 20  | -74  | 12200 | 67400 | 120    | 30000   |
| 16  | 19910731 | 21:18:00 | 02:03:00 | 212.9 | 21  | -69  | 12200 | 60200 | 186    | 90000   |
| 17  | 19910801 | 21:20:00 | 01:46:00 | 213.9 | 21  | -64  | 12200 | 59000 | 145    | 60000   |
| 18  | 19910802 | 20:32:00 | 00:50:00 | 214.9 | 19  | -58  | 12200 | 79400 | 166    | 60000   |
| 19  | 19910803 | 20:17:00 | 21:12:00 | 215.8 | 18  | -53  | 12200 | 62600 | 186    | 60000   |
| 20  | 19910804 | 21:09:00 | 04:46:00 | 216.9 | 18  | -54  | 12200 | 60500 | 170    | 70000   |
| 21  | 19910807 | 20:27:00 | 20:58:00 | 219.9 | 14  | -57  | 12200 | 71900 | 161    | 30000   |
| 22  | 19910809 | 05:55:00 | 06:18:00 | 221.2 | 10  | -60  | 12200 | 44300 | 156    | 20000   |
| 23  | 19910809 | 20:41:00 | 00:00:00 | 221.9 | 11  | -60  | 12200 | 74600 | 172    | 30000   |
| 24  | 19910811 | 21:19:00 | 03:29:00 | 223.9 | 12  | -62  | 12200 | 55400 | 180    | 40000   |
| 25  | 19910812 | 21:08:00 | 03:15:00 | 224.9 | 14  | -67  | 12200 | 73400 | 161    | 50000   |
| 26  | 19910813 | 21:22:00 | 04:01:00 | 225.9 | 16  | -72  | 12200 | 56900 | 169    | 40000   |
| 27  | 19910818 | 22:18:00 | 22:42:00 | 230.9 | 21  | -69  | 12200 | 69200 | 155    | 30000   |
| 28  | 19910819 | 21:10:00 | 21:16:00 | 231.9 | 21  | -63  | 12200 | 58400 | 94     | NaN     |
| 29  | 19910821 | 00:51:00 | 01:14:00 | 233.0 | 19  | -57  | 12200 | 58400 | 139    | 30000   |

|    |          |          |          |       |    |     |       |       |     |       |
|----|----------|----------|----------|-------|----|-----|-------|-------|-----|-------|
| 30 | 19910822 | 00:09:00 | 03:40:00 | 234.0 | 18 | -53 | 12200 | 67100 | 154 | 50000 |
| 31 | 19910823 | 20:43:00 | 21:06:00 | 235.9 | 18 | -52 | 12200 | 62000 | 155 | 30000 |
| 32 | 19910825 | 20:18:00 | 20:24:00 | 237.8 | 16 | -47 | 12200 | 40100 | 124 | 10000 |
| 33 | 19910826 | 20:26:00 | 23:41:00 | 238.9 | 15 | -43 | 12200 | 54500 | 137 | 50000 |
| 34 | 19910829 | 20:04:00 | 20:21:00 | 241.8 | 10 | -29 | 12200 | 56600 | 150 | 20000 |
| 35 | 19910903 | 21:19:00 | 21:38:00 | 246.9 | 8  | -25 | 12200 | 53600 | 178 | 30000 |
| 36 | 19910904 | 19:41:00 | 05:54:00 | 247.8 | 9  | -24 | 12200 | 57500 | 158 | 80000 |
| 37 | 19910905 | 20:12:00 | 20:31:00 | 248.8 | 8  | -24 | 12200 | 58100 | 126 | 30000 |
| 38 | 19910908 | 19:35:00 | 22:42:00 | 251.8 | 8  | -24 | 12200 | 56600 | 119 | 25000 |
| 39 | 19910909 | 20:05:00 | 03:53:00 | 252.8 | 8  | -24 | 12200 | 64400 | 132 | 30000 |
| 40 | 19910912 | 21:17:00 | 05:47:00 | 255.9 | 12 | -22 | 12200 | 58400 | 157 | 80000 |
| 41 | 19910913 | 20:34:00 | 05:42:00 | 256.9 | 15 | -21 | 12200 | 50000 | 162 | 95000 |
| 42 | 19910914 | 20:55:00 | 02:49:00 | 257.9 | 18 | -20 | 12200 | 65600 | 108 | 40000 |
| 43 | 19910915 | 19:21:00 | 05:20:00 | 258.8 | 21 | -19 | 12200 | 49100 | 145 | 60000 |
| 44 | 19910916 | 23:17:00 | 04:49:00 | 260.0 | 25 | -18 | 12200 | 61700 | 150 | 50000 |
| 45 | 19910917 | 22:05:00 | 06:20:00 | 260.9 | 27 | -16 | 12200 | 53000 | 150 | 90000 |
| 46 | 19910918 | 22:18:00 | 03:03:00 | 261.9 | 30 | -15 | 12200 | 56900 | 184 | 60000 |
| 47 | 19910919 | 21:14:00 | 01:38:00 | 262.9 | 35 | -13 | 12200 | 47900 | 142 | 40000 |
| 48 | 19910921 | 20:34:00 | 20:48:00 | 264.9 | 43 | -10 | 12200 | 67700 | 149 | 20000 |

### Professor Vize dataset:

In the case of the Prof. Vize each individual daily file begin also with the metadata on the top lines, containing in the following order latitude, longitude, date, vertical resolution, beginning altitude, number of steps and number of laser shots. Then only two columns altitude (km) and scattering ratio follow. No information on the time the measurements began and ended is provided.

*Table S2: Inventory of the Vize vessel lidar aerosols scattering ratio profiles form January and February 1992. Julian date for 1992. Latitude and longitude in degree with negative sign for south and east respectively. Lower and higher altitude of the profile in meters. Original SR files did not contain the hours the measurements were conducted.*

| No. | Date     | # Day | Lat | Long | Low Z | Max Z | Levels | Shots |
|-----|----------|-------|-----|------|-------|-------|--------|-------|
| 1   | 19920126 | 26    | -8  | -2   | 12300 | 40200 | 94     | 833   |
| 2   | 19920127 | 27    | -4  | -8   | 12300 | 40200 | 94     | 333   |
| 3   | 19920128 | 28    | 0   | -12  | 12300 | 40200 | 94     | 1200  |
| 4   | 19920129 | 29    | 4   | -16  | 12300 | 40200 | 94     | 1200  |
| 5   | 19920130 | 30    | 9   | -18  | 12300 | 40200 | 94     | 1200  |
| 6   | 19920131 | 31    | 14  | -20  | 12300 | 40200 | 94     | 1200  |
| 7   | 19920201 | 32    | 20  | -19  | 12300 | 40200 | 94     | 851   |
| 8   | 19920204 | 35    | 34  | -13  | 12300 | 40200 | 94     | 1200  |
| 9   | 19920206 | 37    | 43  | -11  | 12300 | 40200 | 94     | 1200  |
| 10  | 19920219 | 50    | 56  | 18   | 12300 | 40200 | 94     | 1200  |
| 11  | 19920220 | 51    | 59  | 27   | 12300 | 40200 | 94     | 1200  |

Both datasets are available at PANGAEA open access data repository:

Antuña-Marrero, J. C., Mann, G., Keckhut, P., S. Avdyushin, B. Nardi and and L. W. Thomason, Ship borne lidar measurements in the Atlantic of the 1991 Mt Pinatubo eruption. PANGAEA, <https://doi.pangaea.de/10.1594/PANGAEA.912770> , 2020.
