# Supplementary material for: Shipborne lidar measurements showing the progression of the tropical reservoir of volcanic aerosol after the June 1991 Pinatubo eruption
Source: Copernicus journal article supplement (doi:10.5194/essd-12-2843-2020), 2020-11-14
Supplement: Supplementary file 1 [file essd-12-2843-2020-supplement.zip › S2_Supplement_Trajectory_Loop_in_the_Caribbean.pdf]

**Supplement S2:** Trajectory Loop in the Caribbean.

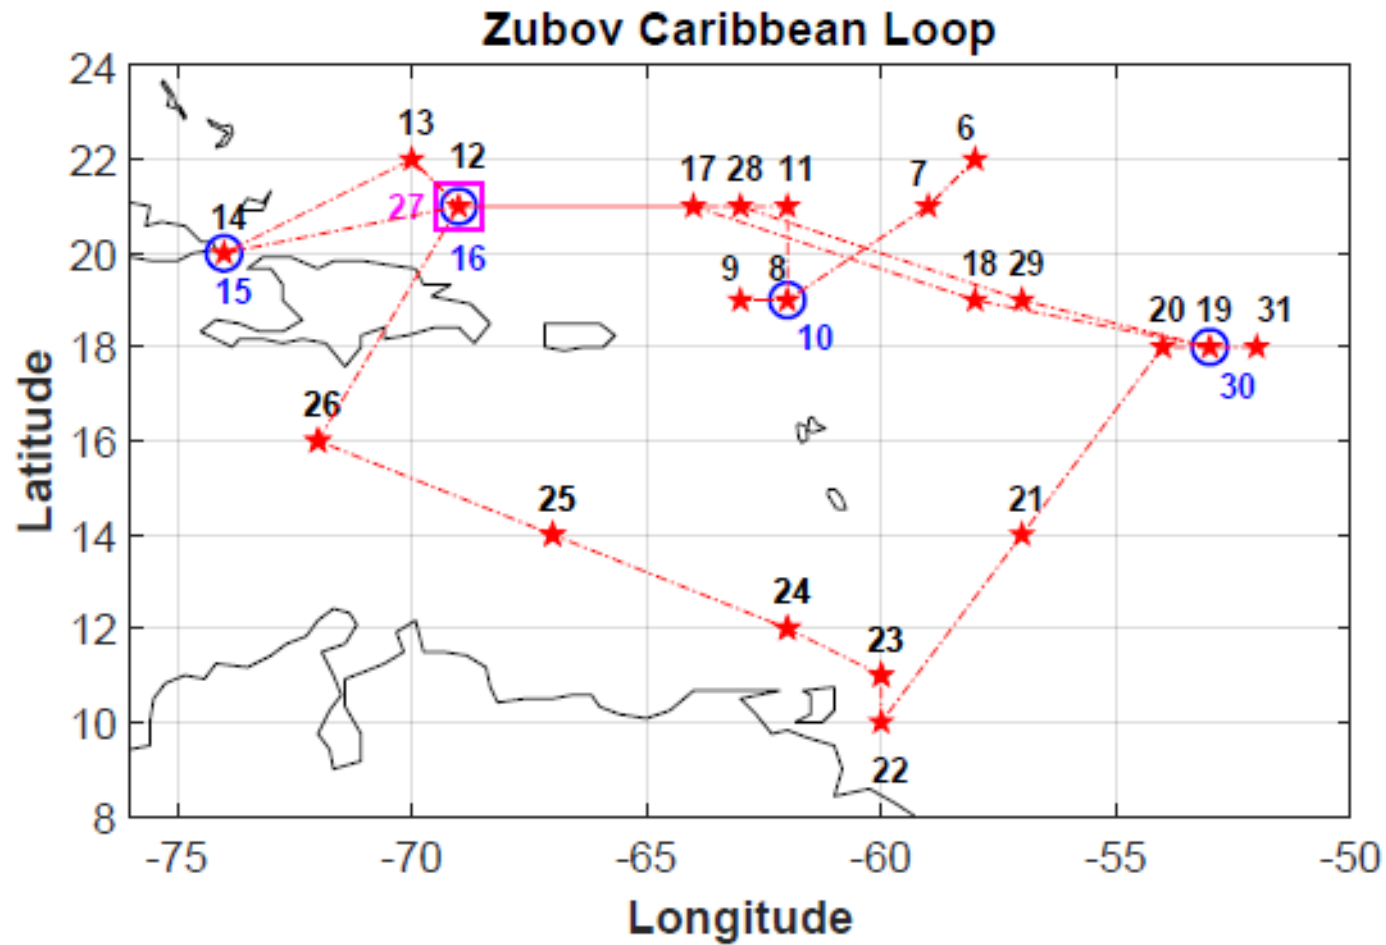

Figure S1: Professor Zubov loop trajectory in the Caribbean. The location of the measurements are identified by the red star with having nearby its consecutive order number in black. In four cases a second measurement was conducted at one of the initial locations. It was the case for measurements number 10, 15, 16 and 30, denoted by a blue circle around the red star and the number colored in blue. In one case a third measurement was conducted at the same location the number 27, identified by a magenta square around the blue circle having the red star in the middle with the 27 in magenta.
