# Supplementary material for: Shipborne lidar measurements showing the progression of the tropical reservoir of volcanic aerosol after the June 1991 Pinatubo eruption
Source: Copernicus journal article supplement (doi:10.5194/essd-12-2843-2020), 2020-11-14
Supplement: Supplementary file 1 [file essd-12-2843-2020-supplement.zip › S3_Supplement_Mean_Lower-stratospheric-winds_August-3-4-1991.pdf]

**Supplement S3:** Mean lower stratospheric winds for August 3<sup>rd</sup> and 4<sup>th</sup> 1991.

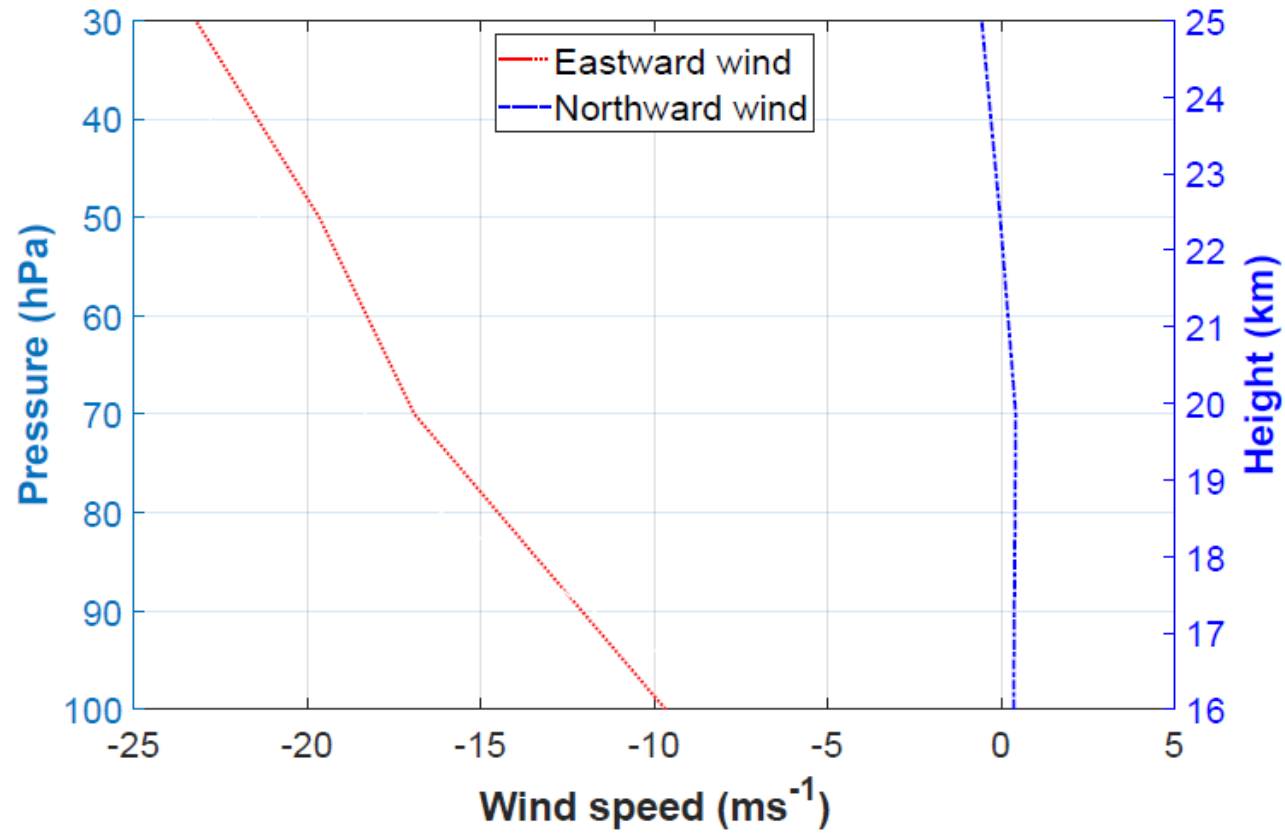

*Figure S2: Mean lower stratosphere northward and eastward wind components for August 3<sup>rd</sup> and 4<sup>th</sup> 1991 in the latitude between 15 and 20 °N and the longitudes 60 to 40 °W using the NCEP Reanalysis data.*
